# Supplementary material
Source: publisher site journal article supplement (https://www.dovepress.com/article/418467)
Supplement: Supplementary file 1 [file get_supplementary_file.php]

**
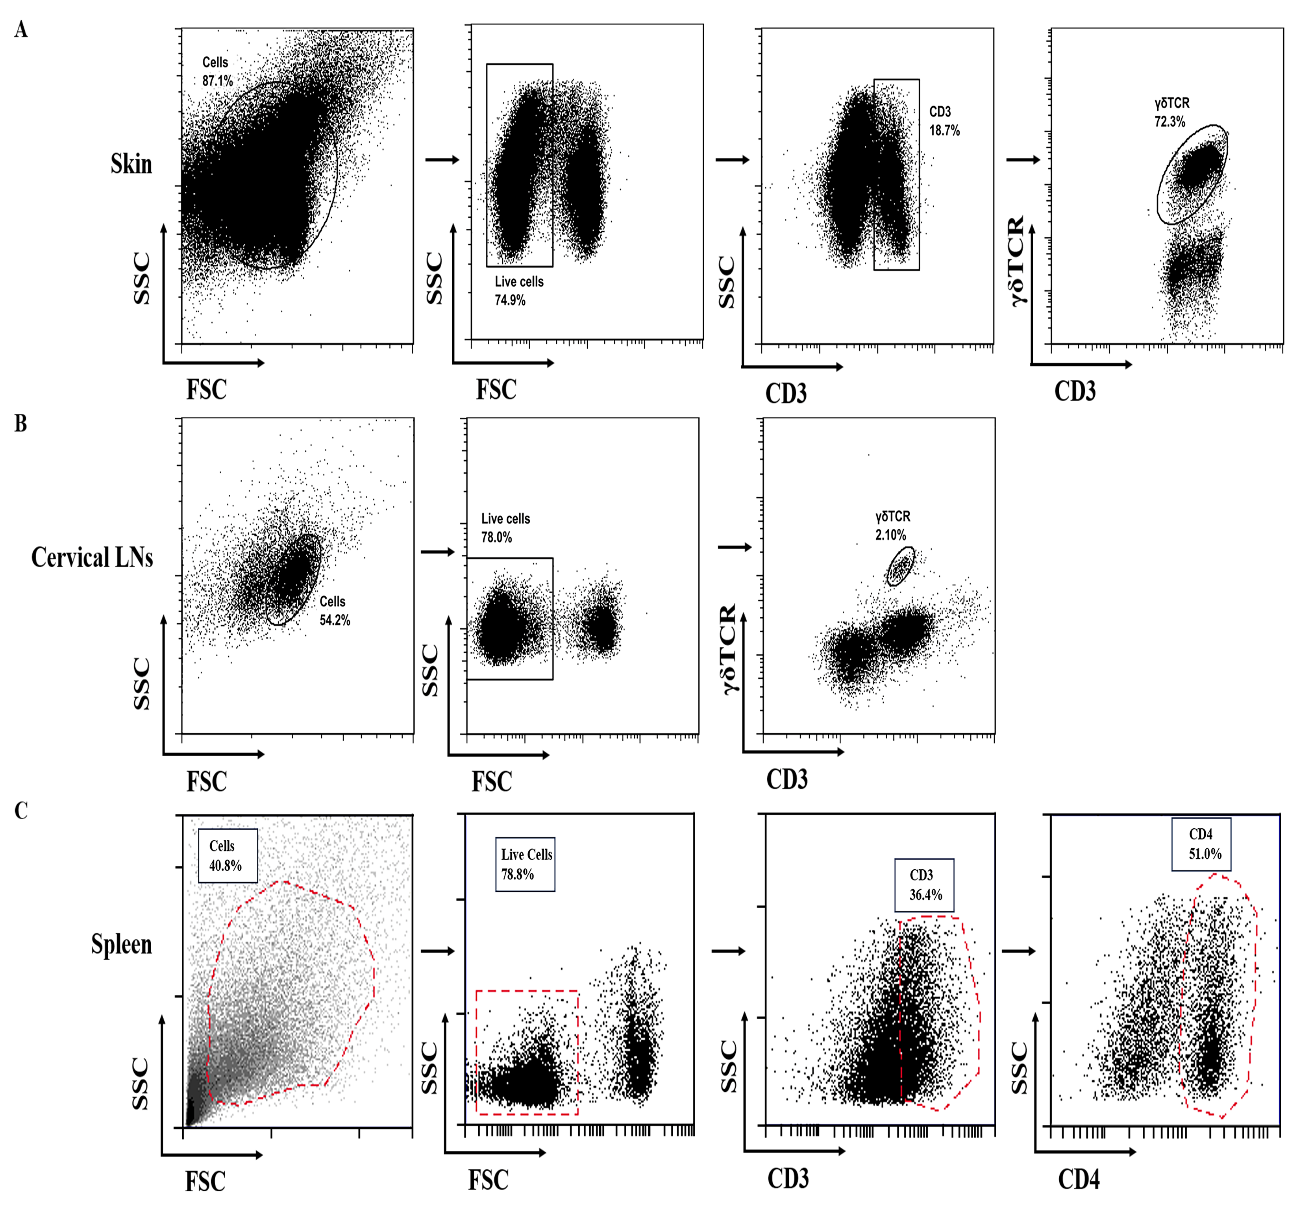
**

**Supplementary Figure 1.** Flow gating strategy for skin and cervical LN and spleen samples. (A) Gating strategy for skin tissues. (B) Gating strategy for LNs. (C) Gating strategy for spleens.
